# Supplementary material
Source: publisher site journal article supplement (https://www.spandidos-publications.com/2937/downloadSupplementary)
Supplement: Supplementary file 1 [file downloadSupplementary]

## Sheet: Sheet1
Table S1. Patient information.
ID	Age	Sex	Date range of recruitment	Inclusion/exclusion criteria
T1	47	Female	09/2014-09/2019	Recurrence-free in 5 years
T2	62	Female	06/2014-08/2017	Exclusion, dead
T3	59	Female	11/2013-11/2018	Recurrence-free in 5 years
T4	61	Male	02/2014-02/2019	Recurrence-free in 5 years
T5	51	Female	12/2013-12/2018	Recurrence-free in 5 years
T6	42	Male	12/2013-12/2018	Recurrence-free in 5 years
T7	53	Male	06/2014-06/2019	Recurrence-free in 5 years
T8	56	Male	05/2014-05/2019	Recurrence-free in 5 years
T9	40	Male	01/2014-01/2019	Recurrence-free in 5 years
T10	64	Male	03/2014-07/2016	Exclusion, dead
